# Supplementary material
Source: PubMed Central journal article supplement (PMC1955774)
Supplement: pnas_0705497104_1.pdf [file pnas_0705497104_1.pdf]

|            | 5     | 10          | 15      | 20        | 25            | 30              | 35          | 40              | 45      | 50      | 55      | 60                    |
|------------|-------|-------------|---------|-----------|---------------|-----------------|-------------|-----------------|---------|---------|---------|-----------------------|
| ScTen1     | M S Q | - - - -     | L V L   | D L K C   | L K D K I A   | T N Y D I H N N | V Y G G N G | M E P N I I H P | S K R F | R I V V | R L V   | D F L F C K           |
| Scastellii | M S Q | - - - -     | L V V   | D I C K L | N Q V L L N L | N E R S K E I F | T N S       | - - - -         | - - - - | S R R F | F R V V | A Q L L D I Q - - P   |
| Klactis    | M S K | - - - -     | I I T   | D L D T I | A G K I E E Y | A G D T L       | - - - -     | - - - -         | - - - - | L R L   | R I F A | Q F Q D I - - - -     |
| Egossypii  | M S R | - - - -     | I V T   | D L A M L | E G V L S G   | A T S A E       | - - - -     | - - - -         | - - - - | R L V L | L R I F | A Q Y E G I - - - -   |
| Dhansanii  | M T K | - - - -     | L I L   | D P L S   | L S L E F P   | K A S E S       | - - - -     | - - - -         | - - - - | R L H R | V R I L | C Q V I E Y - - - -   |
| Calbicans  | M T K | - - - -     | L I L   | N P G D   | L S L I F P   | D I S I S       | - - - -     | - - - -         | - - - - | N P Q R | I R I L | C Q V I K Y - - - -   |
| Ncrass     | M S N | G P L P S Q | L C L   | L P D L   | A L K         | - - - -         | - - - -     | - - - -         | - - - - | K E G D | K V R F | L G C V T S Y - - - - |
| Gzeae      | M S R | G P V P S Q | L H L   | L S D L   | P A V         | - - - -         | - - - -     | - - - -         | - - - - | P V G N | K V R F | L G C V T S Y - - - - |
| Anidulans  | M S N | G P S P S T | R A F   | L A D I   | L S L         | - - - -         | - - - -     | - - - -         | - - - - | P A D S | K V R F | L G W V K T Y - - - - |
| Spombe     | M D S | A K - - - - | L I F I | N Q I N   | D C - - - -   | - - - -         | - - - -     | - - - -         | - - - - | K D G Q | K L R F | L G C V Q S Y - - - - |

|            | 65              | 70          | 75          | 80          | 85          | 90        | 95          | 100         | 105         | 110         | 115         | 120           |
|------------|-----------------|-------------|-------------|-------------|-------------|-----------|-------------|-------------|-------------|-------------|-------------|---------------|
| ScTen1     | S D E E F I K G | F F C Q M I | V R N L     | - - H C     | L N S T N G | A E E     | - - - -     | - - - -     | M R L Y M S | - E R L F   | - - - -     | - S A H K D   |
| Scastellii | Y D D E E N E G | F L C K L I | V G N L     | P D F H A Q | I L D D     | V A H F   | T Q V K N V | R L E L Y V | S - E S     | L Y - - - - | - - - -     | - R S T F     |
| Klactis    | - S H S H E R   | T D G I Y L | H F S N V   | P D F N A E | T N R E R S | - - - -   | - - - -     | - - - -     | Y Y F L I D | - E T I Y   | D E A F     | - - - - -     |
| Egossypii  | - E P S A Q E   | R A A P L L | C F R T I   | P Y F G T A | T E E V R T | - - - -   | - - - -     | - - - -     | Y R L A I D | - E K T Y   | Y A R F     | - - - - -     |
| Dhansanii  | - - - - -       | D D L T A T | L K V R K V | P N I H K F | H T E       | - - - -   | - - - -     | - - - -     | I N L I D   | - E P V A   | E A Y T     | L N V N L F G |
| Calbicans  | - - - - -       | I P N E S C | L I I D     | K I P T V A | E S S T N K | E S       | - - - -     | - - - -     | L V K I D   | V F D I     | L E - - - - | - - - - -     |
| Ncrass     | - - - - -       | S T V A G V | L T L Q     | H H H Q A Q | D S R C V   | - - - -   | - - - -     | - - - -     | V A L V D   | - V T L A   | - - - - -   | - - - - -     |
| Gzeae      | - - - - -       | S T S S A R | L T L G     | H L Y P K D | S T V       | - - - -   | - - - -     | - - - -     | T A S V D   | - V S L L A | - - - - -   | - - - - -     |
| Anidulans  | - - - - -       | N I S T G R | L V L E     | H N Y P R A | K K P K Q P | K Q D P P | - - - -     | - - - -     | S V S V D   | - V N A V   | - - - - -   | - - - - -     |
| Spombe     | - - - - -       | K N G I L R | L I D G     | S S - - - - | - - - -     | - - - -   | - - - -     | - - - -     | S V T C D   | - V T V V   | - - - - -   | - - - - -     |

|            | 125               | 130         | 135             | 140         | 145         | 150           | 155         | 160         | 165         | 170             | 175         | 180         |
|------------|-------------------|-------------|-----------------|-------------|-------------|---------------|-------------|-------------|-------------|-----------------|-------------|-------------|
| ScTen1     | D L R L I N       | - - - -     | G Q V L         | D V R I     | G V W Y     | - - - -       | - - - -     | - - - -     | - - - -     | G I H Q S P P I | F E I I     | D F K I L S |
| Scastellii | D I N C S N R T   | - P E L Y D | A V D L         | T V A I W N | - - - -     | - - - -       | - - - -     | - - - -     | - - - -     | N G F I N I K C | E V I D I   | E I L N     |
| Klactis    | - I N T K S G E R | P H K G D I | L D M R C C Y   | - - - -     | - - - -     | - - - -       | - - - -     | - - - -     | - - - -     | R K Y D K V     | V E I M H L | K V I S     |
| Egossypii  | - I E R L P       | - - P Y Q G | D I L D L R C G | V - - - -   | - - - -     | - - - -       | - - - -     | - - - -     | - - - -     | I H G E -       | V E I M H I | D V V S     |
| Dhansanii  | V L N K M N A E S | I S V G T I | V N I V -       | G Y - - - - | - - - -     | - - - -       | - - - -     | - - - -     | - - - -     | F N G E K V     | N V I E C Y | S V N       |
| Calbicans  | D I L S I E I I   | - - - -     | N K G T I I     | N I D -     | G Y - - - - | - - - -       | - - - -     | - - - -     | - - - -     | Y D G E K I     | Q P I D I   | Y E I N     |
| Ncrass     | - L R T L K S D Q | V R I G E W | V N V I -       | G Y I T A V | N P F P A R | K G S M R E   | N E T F Q A | R V Q M Q Q | V R I R A L | L V W S         | S T G       |             |
| Gzeae      | - L Q S L T N E K | T R V G E Y | V N V I -       | G Y V T E Q | K T I R H K | K P P Y Q E   | S K - - - - | - - - -     | - - - -     | Q V G V Q A     | I V L W     | S T G       |
| Anidulans  | - L E T V T W E E | L C V G A W | V N V I -       | G Y V R R E | P V Q S L K | G E P - - - - | - - - -     | - - - -     | - - - -     | S V Y V D A     | V V I F P A | G           |
| Spombe     | - L P D V S I Q   | K H - - - - | E W L N         | I V -       | G R K R Q D | G I - - - -   | - - - -     | - - - -     | - - - -     | - - - -         | V D V L L I | R S A V     |

|            | 185         | 190           | 195         | 200         | 205           | 210         | 215     |
|------------|-------------|---------------|-------------|-------------|---------------|-------------|---------|
| ScTen1     | R N - - D V | R D F C E F   | V K S P L   | - - - -     | G E K F L N   | I S N S     | - - - - |
| Scastellii | L E - - E V | N Q L R E F   | I A S P M   | - - - -     | G Q E F L Q   | L S N S     | - - - - |
| Klactis    | I A - - D L | D S L R E F   | L A K A D D | D S E I R S | F L R - - - - | - - - -     | - - - - |
| Egossypii  | M R - - E L | A R L R S F   | L A T E D   | - - - -     | G Q Q F M K   | L T G I D   | - - - - |
| Dhansanii  | G S S M I P | E N N I K V   | L A E I S K | L K D F D   | - - - -       | - - - -     | - - - - |
| Calbicans  | G - I N F T | I E N I E I   | L N Q M K S | L T - - - - | - - - -       | - - - -     | - - - - |
| Ncrass     | - - - - -   | P L D T Q R Y | N E S V D A | L K S C C S | I T A P N S   | A S K N G Q | - - - - |
| Gzeae      | - - - - -   | P M D L Q K Y | E K - - - - | - - - -     | - - - -       | - - - -     | - - - - |
| Anidulans  | - - - - -   | A V D L G E Y | - - - -     | - - - -     | - - - -       | - - - -     | - - - - |
| Spombe     | - - - - -   | G I N L P R Y | R Q M V S E | R Q K C D   | - - - -       | - - - -     | - - - - |
