# Supplementary material
Source: PubMed Central journal article supplement (PMC1955774)
Supplement: pnas_0705497104_2.pdf [file pnas_0705497104_2.pdf]

*AspRS\_Tthermophilus*:  $\eta_1$   $\eta_2$   $\beta_1$   $\rightarrow$  TT

*AspRS\_Tthermophilus*: 1 MRR.....THYAGSLRETHVVG.....EVEVLEGVVNRRRDLGG.....

*Ten1\_Ncrass*: 1 MSNGPLPSQLCLLPDLALKKEG.....DKVRFVFLGCVTSYSTVAG.....

*Ten1\_Gzeae*: 1 MSRGVPVPSQLHLLSDLPVAVPVG.....NKVRFVFLGCVTSYSTSSA.....

*Ten1\_Anidulans*: 1 MSNGPSPSTRAFLADILSLPAD.....SKVRFVFLGWVKTYNISTG.....

*Ten1\_Spombe*: 1 MDS...AKLIFINQINDCKDG.....QKLRFLGCVQSY..KNG.....

*Ten1\_Scerevisiae*: 1 MSQ.....LVLDLKLCKDKIATNYDIHNNVYGGNGMEPNIIHPSKRFRIVVRLVDFLFCKSDEEFIKGF

*Rpa32\_Hsapiens*: 136 .....PCTISQLLSATLVDEVFRIGNVEI.....SQVTVVGIIRHAEKAP.....

*Rpa14\_Hsapiens*: 1 MVDMMDLPRSRINAGMLAQFID.....KPVCFVGRLEKIHPTG.....

*Rpa14\_Hsapiens*:  $\beta_1$   $\eta_1$   $\rightarrow$  TT  $\beta_2$   $\rightarrow$  TT

*AspRS\_Tthermophilus*:  $\beta_2$   $\rightarrow$  TT  $\beta_3$   $\rightarrow$   $\alpha_1$   $\eta_1$   $\rightarrow$  TT  $\beta_4$   $\rightarrow$  TT

*AspRS\_Tthermophilus*: 34 ..LIFLDLRDRE.....GLVQLVAHPASPAY.ATAERVVRPEWVVRAKGLVRL.....RPEPNPRL

*Ten1\_Ncrass*: 40 ..VLT LQHHHQAQDS.....RCVVALVDVTLALRTLKSDQVRIGEWVNVIGYITAVNPPFPARKGSMREN

*Ten1\_Gzeae*: 40 ..RLTLGHLYPKD.....STVTASVDVSLLLQSLTNEKTRVGEVNVVIGYVTEQKTI RHKKPPYQES

*Ten1\_Anidulans*: 40 ..RLVLEHNYPRAKKPKQPKQDPPSVSVVDVNAVLETVTWEELCVGAWVNVIGYVREPVQSLKGEPE..S

*Ten1\_Spombe*: 34 ..ILRLID.....GSSSVTCDVTVVLDPVSIQKH...EWLVNIVGRKRQD.....

*Ten1\_Scerevisiae*: 65 FCQMIVRNHLHCLNSTNGA...EEMRLYMSERLFSAHKDDLRLINGQVLDVRIWVYGIHQSP.....

*Rpa32\_Hsapiens*: 176 ..TNIVYKIDDMTA.....APMDVRQWVDTDDTSSENTVVPPEYVVKVAGHLRSFQ.....

*Rpa14\_Hsapiens*: 39 ..KMFILSDGEG.....KNGTIELMEPL.....DEEIS.GIVEVVGRTAK.....

*Rpa14\_Hsapiens*:  $\beta_3$   $\rightarrow$  TT  $\beta_4$   $\rightarrow$   $\beta_5$   $\rightarrow$  TT

*AspRS\_Tthermophilus*:  $\beta_5$   $\rightarrow$   $\eta_3$   $\eta_3$

*AspRS\_Tthermophilus*: 86 AT.....GRVEVELSALVELLAEAKTPPFVDAWVRGEEK.....

*Ten1\_Ncrass*: 102 ETFQARVQMQRVIRALLVWSVSGP.....LDTQRYNESVDALKSCCSITAPNSASKNGQ

*Ten1\_Gzeae*: 100 K.....QVGVQAIVLWSTGP.....MDLQKYEK.....

*Ten1\_Anidulans*: 105 D.....SVYVDVAVVIFPAGA.....VDLGEY.....

*Ten1\_Spombe*: 73 .....GIVDVLIRSAVG.....INLPRYRQMVSRQKCD.....

*Ten1\_Scerevisiae*: 124 .....PIFEIIFKILSR.....NDVRFDFCEVKSPLGKFLNISNS.....

*Rpa32\_Hsapiens*: 225 .....NKKSLVAFKIMPLEDM.....NEFTTHILEVINAHMVLVS.....

*Rpa14\_Hsapiens*: 77 .....ATI LCTS YVQFKEDSHP...FDLGLYNEAVKIIHDFPQ.....

*Rpa14\_Hsapiens*:  $\beta_6$   $\rightarrow$   $\alpha_1$   $\eta_3$
