# Supplementary material
Source: PubMed Central journal article supplement (PMC1955774)
Supplement: pnas_0705497104_3.pdf [file pnas_0705497104_3.pdf]

**Table 1. *S. pombe* strains used in this study**

| <b>Strain</b> | <b>Genotype</b>                                                                              | <b>Origin</b>         |
|---------------|----------------------------------------------------------------------------------------------|-----------------------|
| PR109         | <i>ura4-D18 leu1-32</i>                                                                      | Laboratory collection |
| BM3073        | <i>pku70::13myc-kanMX6 ade6-M210 ura4-D18 leu1-32</i>                                        | Laboratory collection |
| TMN2666       | <i>taz1::ura4<sup>+</sup> ade6-M210 leu1-32 ura4-D18</i>                                     | Laboratory collection |
| TMN2937       | <i>rad3::ura4<sup>+</sup> ura4-D18 leu1-32 ade6-M216 his3-D1</i>                             | Laboratory collection |
| VM266         | <i>stn1::kanMX/stn1<sup>+</sup> leu1-32/leu1-32 ura4-D18/ura4-D18 ade6-M210/ade6-M216</i>    | This study            |
| VM270         | <i>stn1::kanMX leu1-32 ura4-D18 ade6</i>                                                     | This study            |
| VM300         | <i>ten1::hphMX/ten1<sup>+</sup> leu1-32/leu1-32 ura4-D18/ura4-D18 ade6M210/ade6-M216</i>     | This study            |
| VM309         | <i>pot1::hphMX leu1-32 ura4-D18 ade6<sup>+</sup></i>                                         | This study            |
| VM310         | <i>ten1::hphMX leu1-32 ura4-D18 ade6<sup>+</sup></i>                                         | This study            |
| VM331         | <i>stn1::myc-kanMX ura4-D18 leu1-32 h<sup>+</sup></i>                                        | This study            |
| VM332         | <i>ten1::myc-kanMX ura4-D18 leu1-32 h<sup>+</sup></i>                                        | This study            |
| VM333         | <i>pot1::myc-kanMX ura4-D18 leu1-32 h<sup>+</sup></i>                                        | This study            |
| VM337         | <i>pot1-CFP:hphMX ura4-D18 leu1-32 h<sup>+</sup></i>                                         | This study            |
| VM338         | <i>ten1-GFP:kanMX ura4-D18 leu1-32 ade6-M210</i>                                             | This study            |
| VM340         | <i>stn1-GFP:kanMX ura4-D18 leu1-32 his3-D1 ade6-M210</i>                                     | This study            |
| VM345         | <i>taz1::ura4<sup>+</sup> stn1-GFP:kanMX ura4-D18 leu1-32 his3-D1 ade6-M210</i>              | This study            |
| VM346         | <i>taz1::ura4<sup>+</sup> pot1-GFP:kanMX ura4-D18 leu1-32</i>                                | This study            |
| VM348         | <i>taz1::ura4<sup>+</sup> ten1-GFP:kanMX ura4-D18 leu1-32 ade6-M210</i>                      | This study            |
| VM350         | <i>taz1::ura4<sup>+</sup> rad32::kanMX pot1-GFP:kanMX ura4-D18 leu1-32 his3-D1 ade6-M210</i> | This study            |
| VM352         | <i>taz1::ura4<sup>+</sup> rad32::kanMX ten1-GFP:kanMX ura4-D18 leu1-32 his3-D1 ade6-M210</i> | This study            |
| VM354         | <i>taz1::ura4<sup>+</sup> rad32::kanMX stn1-GFP:kanMX ura4-D18 leu1-32 his3-D1 ade6-M210</i> | This study            |
| VM357         | <i>taz1::ura4<sup>+</sup> pot1-13myc:kanMX ura4-D18 leu1-32</i>                              | This study            |
| VM360         | <i>taz1::ura4<sup>+</sup> pku70-13myc:kanMX ura4-D18 leu1-32 his3-D1 ade6-M210</i>           | This study            |
| VM361         | <i>taz1::ura4<sup>+</sup> ten1-13myc:kanMX ura4-D18 leu1-32</i>                              | This study            |
| VM363         | <i>taz1::ura4<sup>+</sup> stn1-13myc:kanMX ura4-D18 leu1-32</i>                              | This study            |
| VM364         | <i>taz1::ura4<sup>+</sup> pot1-CFP:hphMX ten1-GFP:kanMX ura4-D18 leu1-32 ade6-M210</i>       | This study            |
| VM365         | <i>taz1::ura4<sup>+</sup> pot1-CFP:hphMX stn1-GFP:kanMX ura4-D18 leu1-32 ade6-M210</i>       | This study            |
